# Supplementary material for: RETRACTED: Regions of Bovine Adenovirus-3 Protein VII Involved in Interactions with Viral and Cellular Proteins
Source: MDPI journal article supplement (doi:10.3390/v16050732), 2024-05-05
Supplement: s1 [file s1]

## Supplementary Files

### Plasmid Construction

**Table S1.** List of primers used for PCR.

| Primer Name         | Sequence                                                            |
|---------------------|---------------------------------------------------------------------|
| <i>EcoRI</i> .fw.N  | CCGCGAATTCATGGCCATTCTAATCTCTCC                                      |
| RV. <i>EcoRV</i> .N | CCGGGATATCATTTCAAACGGTGTTGCTGACC                                    |
| FW1 <i>SphI</i>     | ATTGCATGCGGACATCGTGTTGCTGCCGGGCTGTG                                 |
| RV1 <i>SbfI</i>     | GCAAAAAAAAAAGTAGCAGACATTCCTGCAGGGTTCCTGAC<br>AGTCCCTGGTG            |
| FW2 <i>SbfI</i>     | CACCAGGGACTGTCAGGAACCCTGCAGGAATGTCTGCTA<br>CTTTTTTTTGC              |
| RV2 <i>HpaI</i>     | ATTGTTAACAAGCTGTGTGGGGCTGGCGCCGGCTCT                                |
| IF.Strep            | GCACCGGTCGGGTGGGTGCTGGTCACACCCACAATTC<br>GAGAAGCGCGCAACCGCAGCTTTAG  |
| IR.Strep            | CTAAAGCTGCGGTTGCGCGCTTCTCGAATTGTGGGTGTG<br>ACCAGCGACCCACCCGACCGGTGC |
| EF.Strep            | CTTTAGTCTGGGCTATGACCCGCAGACCCAGTTAGTGAC<br>G                        |
| ER.Strep            | GCACCTGTTGTTGGGTCAGGCGTTGAGCTACTTGAG                                |
| Fw seq all          | TAAGCAGACAGGGGCGACAGCAG                                             |
| Rv seq all          | CAGTCGGCGGGCTTTTATTGAAG                                             |
| <i>XhoI</i> FP      | CGCTCGAGTCAATAAAATTCTTTATTTTTCCTGTGATAATA<br>C                      |

|                              |                                                        |
|------------------------------|--------------------------------------------------------|
| <i>KpnI</i> RP               | GACGGTACCATGGACACCCGAGGGGCGACGAAAAGTTCCG<br>G          |
| pVIII-Fwd                    | GGCGCGGAATTCATGAGCAAAGAAATTCACACACC                    |
| pVIII-Rev                    | GTCCTCGAGTCAGCTATAACCGCTCACAGAG                        |
| pVII. <i>SalI</i> .Rv        | GAG GTCGACTCAAACGGTGTTGCTGACCGTAG                      |
| Fw. <i>EcoRI</i> .pVII.del 1 | AUUGAATTCATGGCCGCCTGGGGCAGCCGCACCGGTCCG<br>GGTG        |
| <i>XhoI</i> .Rv              | CCGGCTCGAGATTTCAAACGGTGTTGCTGAC                        |
| IR.pVII.Del 2                | GTCTGCGGCGCCGGTACTGGCGCCGATAATGCGACCGC<br>ACCTTCACTG   |
| IF.pVII.Del 2                | CAGTGAAGGTGCGGTTCGATTATCGGCGCCAGTACCGG<br>CGCCGCAGAC   |
| IR.pVII.Del 3                | GTCTGCTGCGATAGCGGCCGCGGCGTCAGCCACCACCG<br>CCTCGATTG    |
| IF.pVII.Del 3                | CAATCGAGGCGGTGGTGGCTGACGCCGCGGCCGCTATC<br>GCAGCAGAC    |
| RVp7Del4stop <i>XhoI</i>     | ATTCTCGAGTCAGCGCCGGGCCACCCTGCGGGCCCTC                  |
| RVp7Del4Astop <i>XhoI</i>    | ATTCTCGAGTCACATGGCCATGGCCGCGTCTGCTGCG                  |
| RVp7Del4Bstop <i>XhoI</i>    | ATTCTCGAGTCAGTAGATGTTACGGCGTCGCCGAGC                   |
| RVp7Del4Cstop <i>XhoI</i>    | ATTCTCGAGTCAAACGCGGGCTCCGGTTGCCGCATCG                  |
| IR.pVII.Del 3.1              | GAACCCGTCGCTGCAGGGCAGTGCGGTGAGCCACCACC<br>GCCTCGATTGTG |
| IF.pVII.Del 3.1              | CACAATCGAGGCGGTGGTGGCTGACCGCACTGCCCTGC<br>AGCGACGGGTTC |

|                              |                                                                                |
|------------------------------|--------------------------------------------------------------------------------|
| IR.pVII.Del 3.2              | CTGCGATAGCGGCCGCGCGCCGGCCGGGGCTCCGACG<br>CAACCTTCTGACTC                        |
| IF.pVII.Del 3.2              | GAGTCAGAAGGTTGCGTCGGAGCCCCGGCCGGCGCGC<br>GGCCGCTATCGCAG                        |
| IR.pVII.Del 70-90            | GACGCAACCTTCTGACTCGGCGCACCAACGGATCACCG<br>GTGGCCGCGAC                          |
| IF.pVII.Del 70-90            | GTCGCGGCCACCGGTGATCCGGTGGTGCGCCGAGTCAG<br>AAGGTTGCGTC                          |
| IR.pVII.Del 126-137          | GTACCCAGTAGATGTTACGGCGTCGCCGAGCTGGCGCC<br>GCGCGCCGGCCCACCCTGCGGGCCCTCGCCACTTG  |
| IF.pVII.Del 126-137          | CAAGTGGCGAGGGCCCCGCAGGGTGGGCCGGCGCGCGG<br>CGCCAGCTCGGCGACGCCGTAACATCTACTGGGTAC |
| <i>NotI</i> RP               | TGGCGGCCGCTCAATAAAATTCTTTATTTTTCCTGTGATA<br>ATACC                              |
| <i>SacI</i> FP               | GCGAGCTCATGGACACCCGAGGGCGACGAAAAG                                              |
| pVIII RP                     | GAGCGGCCGCTTAAACGTGCGGCTAGATAGCACTTG                                           |
| pVIII FP                     | GCGAGCTCATGAGCAAAGAAATTCCCACACCTTATG                                           |
| <i>SalI</i> .Rv.pVII. Del 4  | AUUGTCGACTCAGCGCCGGCCCACCCTGCGGGCCCTC                                          |
| <i>SalI</i> .Rv.pVII. Del 4A | ATTGTCGACTCACATGGCCATGGCCGCGTCTGCTGCG                                          |
| <i>SalI</i> .Rv.pVII. Del 4B | ATTGTCGACTCAGTAGATGTTACGGCGTCGCCGAGC                                           |
| <i>SalI</i> .Rv.pVII. Del 4C | ATT GTCGACTCAAACGCGGGCTCCGGTTGCCGCATCG                                         |

**Note: *pMCS-VIId*.** A 840 bp DNA fragment was amplified by PCR using primers FW1*SphI* and RV1*SbfI* (Table S1), and plasmid PUC304A+ [21] DNA as a template. Similarly, a 1916 bp DNA fragment was amplified by PCR using primers FW2*SbfI* and RV2*ChpI* (Table S1), and plasmid PUC304A+ DNA as a template. In the

third PCR, these two PCR products were mixed, reannealed and used as DNA template to amplify a 2764 bp PCR product by overlapping PCR using FW1 *SphI* and RV2CH*paI* primers (Table S1). The final PCR product (2764 bp) was digested with *SphI* - *HpaI* and ligated to *SphI* - *HpaI* digested plasmid pMCS to create transfer plasmid pMCS-VIId .

**pMCS-pVIIIdKAN.** A 1240 bp *SbfI* DNA fragment was isolated from plasmid pUC4K [71] and ligated to *SbfI* digested plasmid pMCS-VIId to create plasmid pMCS-pVIIIdKAN.

**pPUC304A.Kan.dpVII.** A 3996 bp *SphI* - *HpaI* DNA fragment was isolated from plasmid pMCS-pVIIIdKAN and recombined with plasmid PUC304A+ plasmid to create plasmid pPUC304A.Kan.dpVII.

**pPUC304A.dVII.** The plasmid pPUC304A.Kan.dpVII was digested with *SbfI* and the large fragment was re-ligated to create plasmid pPUC304A.dVII. The identity of the plasmid was confirmed by RE analysis and sequencing of DNA by Fw seq all and Rv seq all primers (Table S1).

**pcDNA3.HA.pVII.Strep.** An 1105bp DNA fragment was amplified by PCR using primers EF.Strep and IR.Strep (Table S1), and plasmid pUC304A+ [21] DNA as a template. A 1349bp DNA fragment was amplified by PCR using primers ER.Strep and IF.Strep (Table S1), and plasmid pUC304A+ DNA as a template. In the third PCR, two PCR products were annealed to amplify a 2391bp fragment with a Strep-tag II encoding sequence (introduced between amino acid 52-53 in pVII) by overlapping PCR using primers EF.Strep and ER.Strep (Table S1). Finally, pVII containing strep tag was amplified by PCR using primers *EcoRI*.fw.N and RV.*EcoRV*.N (Table S1) and 2391bp PCR product as a template. The new PCR product was digested with *EcoRI*-*EcoRV* and ligated to *EcoRI*-*EcoRV* digested plasmid pcDNA3.HA DNA to create plasmid pcDNA3.HA.pVII.Strep.

**pPUC304A.pVIIStrep.** A 1105bp DNA fragment was amplified by PCR using primers EF.Strep and IR.Strep (Table S1), and plasmid pUC304A+ [21] DNA as a template. A 1349bp DNA fragment amplified by PCR using primers ER.Strep and IF.Strep (Table S1), and plasmid pUC304A+ [21] DNA as a template. In the third PCR, two PCR products were annealed to amplify a 2391bp fragment with a Strep-tag II encoding sequence (introduced between amino acid 52-53 in pVII) by overlapping PCR using primers EF.Strep and ER.Strep (Table S1). Finally, the *SbfI* digested plasmid

*pPUC304A.dVII* DNA was recombined with the 2391bp PCR product to create plasmid *pPUC304A.pVIIStrep*.

**pC.IVa2.** A 1364 bp DNA fragment was amplified by PCR using primers *XhoI* FP (including 13 nucleotide splice sequence) and *KpnI* RP (Table S1), and plasmid pUC304A+ [21] DNA as a template. The PCR product was digested with *KpnI-XhoI* and ligated to *KpnI-XhoI* digested plasmid, pCDNA3 (Invitrogen) creating plasmid pC.IVa2.

**pC.pVIII.** A 672bp DNA fragment was amplified by PCR using primers *pVIII-Fwd* and *pVIII-Rev* (Table S1), and plasmid pFBAV302 (72) DNA as a template. The PCR product was digested with *EcoRI - XhoI* and ligated to *EcoRI - XhoI* digested plasmid pcDNA3.1 DNA (Invitrogen) creating plasmid pC.pVIII.

**pC.HA.pVII.** The full-length VII protein coding sequence (516bp) was amplified by PCR using primers *EcorI.fw.N* and *RV.EcorV.N* (Table S1) and plasmid PUC304A+ [21] DNA as a template. The PCR product was digested with *EcoRI-EcoRV* and ligated to *EcoRI-EcoRV* digested plasmid pcDNA3.HA DNA to create plasamid pC.HA.pVII.

**pC.HA.pVII d1.** A 396 bp DNA fragment was amplified by PCR using primers *Fw.EcorI.pVII.del 1* and *Xho1.Rv* (Table S1), and plasmid PUC304A+ [21] DNA as a template. The PCR fragment was digested with *EcoRI-Xho1* and ligated to *EcoRI-Xho1* digested plasmid pcDNA3.HA DNA creating plasmid pC.HA.pVII d1 (containing a deletion of protein VII amino acid 1-40).

**pC.HA.pVII d2.** A 1000 bp DNA fragment was amplified by PCR using primers *EF.Pro* and *IR.pVII.Del 2* (Table S1), and plasmid PUC304A+ [21] DNA as a template. Similarly, a 1000 bp DNA fragment was amplified by PCR using primers *IF.pVII.Del 2* and *ER.Pro* (Table S1), and plasmid PUC304A+ DNA as a template. In the third PCR, these two PCR products were reannealed and used as DNA template to amplify a 396 bp PCR product by overlapping PCR using *EcorI.fw.N* and *Xho1.Rv* primers (Table S1). This final PCR product was digested with *EcoRI-Xho1* and ligated to *EcoRI-Xho1* digested plasmid pCDNA3HA DNA creating plasmid pC.HA.pVII d2 (containing a deletion of protein VII amino acid 41-80).

**pC.HA.pVII d3.** A 1000 bp DNA fragment was amplified by PCR using primers *EF.Pro* and *IR.pVII.Del 3* (Table S1), and plasmid PUC304A+ [21] DNA as a template. Similarly, a 1000 bp DNA fragment was amplified by PCR using primers

IF.pVII.Del 3 and ER.Pro (Table S1), and plasmid PUC304A+ DNA as a template. In the third PCR, these two PCR products were reannealed and used as DNA template to amplify a 381 bp PCR product by overlapping PCR using *Eco*rl.fw.N and *Xho*1.Rv primers (Table S1). This final PCR product was digested with *Eco*RI-*Xho*1 and ligated to *Eco*RI-*Xho*1 digested plasmid pCDNA3HA DNA creating plasmid pC.HA.pVIIId3 (containing a deletion of protein VII amino acid 81-125).

**pC.HA.pVIIId4.** A 375 bp DNA fragment was amplified by PCR using primers *Eco*rl.fw.N and RVp7Del4stop*Xho*1 (Table S1), and plasmid PUC304A+ DNA as a template was digested with *Eco*RI-*Xho*1 and ligated to *Eco*RI-*Xho*1 digested plasmid pCDNA3.HA DNA creating plasmid pC.HA.pVIIId4 (containing a deletion of protein VII amino acid 126-171).

**pC.HA.pVIIId3.1.** A 1000 bp DNA fragment was amplified by PCR using primers EF.Pro and IR.pVII.Del 3.1 (Table S1), and plasmid PUC304A+ [21] DNA as a template. Similarly, a 1000 bp DNA fragment was amplified by PCR using primers IF.pVII.Del 3.1 and ER.Pro (Table S1), and plasmid PUC304A+ [21] DNA as a template. In the third PCR, these two PCR products were reannealed and used as DNA template to amplify a 460 bp PCR product by overlapping PCR using *Eco*rl.fw.N and *Xho*1.Rv primers (Table S1). This final PCR product was digested with *Eco*RI-*Xho*1 and ligated to *Eco*RI-*Xho*1 digested plasmid pCDNA3HA DNA creating plasmid pC.HA.pVIIId3.1 (containing a deletion of protein VII amino acid 80-101).

**pC.HA.pVIIId3.2.** A 1000 bp DNA fragment was amplified by PCR using primers EF.Pro and IR.pVII.Del 3.2 (Table S1), and plasmid PUC304A+ [21] DNA as a template. Similarly, a 1000 bp DNA fragment was amplified by PCR using primers IF.pVII.Del 3.2 and ER.Pro (Table S1), and plasmid PUC304A+ [21] DNA as a template. In the third PCR, these two PCR products were mixed and reannealed and used as DNA template to amplify a 460 bp PCR product by overlapping PCR using *Eco*rl.fw.N and *Xho*1.Rv primers (Table S1). This final PCR product was digested with *Eco*RI-*Xho*1 and ligated to *Eco*RI-*Xho*1 digested plasmid pCDNA3HA DNA creating plasmid pC.HA.pVIIId3.2 (containing a deletion of protein VII amino acid 102-122).

**pC.HA.pVIIId70-90.** A 1000 bp DNA fragment was amplified by PCR using primers

EF.Pro and IR.pVII.Del 70-90 (Table S1), and plasmid PUC304A+ [21] DNA as a template. Similarly, a 1000 bp DNA fragment was amplified by PCR using primers IF.pVII.Del 70-90 and ER.Pro (Table S1), and plasmid PUC304A+ DNA as a template. In the third PCR, these two PCR products were reannealed and used as DNA template to amplify a 450 bp PCR product by overlapping PCR using *EcorI*.fw.N and *XhoI*.Rv primers (Table S1). This final PCR product was digested with *EcoRI-XhoI* and ligated to *EcoRI-XhoI* digested plasmid pCDNA3HA DNA creating plasmid pC.HA.pVIIId70-90 (containing a deletion of protein VII amino acid 70-90).

**pC.HA.pVIIId4.1.** A 411 bp DNA fragment was amplified by PCR using primers *EcorI*.fw.N and RVp7Del4Astop*XhoI* (Table S1), and plasmid PUC304A+ [21] DNA as a template. The PCR product was digested with *EcoRI-XhoI* and ligated to *EcoRI-XhoI* digested plasmid pcDNA3.HA DNA creating plasmid pC.HA.pVIIId4.1 (containing a deletion of protein VII amino acid 137-171).

**pC.HA.pVIIId4.2.** A 444 bp DNA fragment was amplified by PCR using primers *EcorI*.fw.N and RVp7Del4Bstop*XhoI* (Table S1), and plasmid PUC304A+ [21] DNA as a template. The PCR product was digested with *EcoRI-XhoI* and ligated to *EcoRI-XhoI* digested plasmid pcDNA3.HA DNA creating plasmid pC.HA.pVIIId4.2 (containing a deletion of protein VII amino acid 148-171).

**pC.HA.pVIIId4.3.** A 477 bp DNA fragment was amplified by PCR using primers *EcorI*.fw.N and RVp7Del4Cstop*XhoI* (Table S1), and plasmid PUC304A+ [21] DNA as a template. The PCR product was digested with *EcoRI-XhoI* and ligated to *EcoRI-XhoI* digested plasmid pcDNA3.HA DNA creating plasmid pC.HA.pVIIId4.3 (containing a deletion of protein VII amino acid 159-171).

**pC.HA.pVIIId126-137.** A 1000 bp DNA fragment was amplified by PCR using primers EF.Pro and IR.pVII.Del 126-137 (Table S1), and plasmid PUC304A+ [21] DNA as a template. Similarly, a 1000 bp DNA fragment was amplified by PCR using primers IF.pVII.Del 126-137 and ER.Pro (Table S1), and plasmid PUC304A+ DNA as a template. In the third PCR, these two PCR products were reannealed and used as DNA template to amplify a 483 bp PCR product by overlapping PCR using *EcorI*.fw.N and *XhoI*.Rv primers (Table S1). This final PCR product was digested with *EcoRI-XhoI* and ligated to *EcoRI-XhoI* digested plasmid pCDNA3HA DNA creating plasmid

pC.HA.pVII~~d~~126-137 (containing a deletion of protein VII amino acid 126-137).

**pGN.IVa2.** The full-length IVa2 protein coding sequence (1347 bp) was amplified by PCR using primers *SacI* FP and *NotI* RP (Table S1), and plasmid PUC304A+ [21] DNA as a template. The PCR product was digested with *SacI*-*NotI* and ligated to *SacI*-*NotI* digested plasmid pGN.linker DNA [29] to create plasmid pGN.IVa2.

**pGN.pVIII.** The full-length protein VIII protein coding sequence (651 bp) was amplified by PCR using primers pVIII FP and pVIII RP (Table S1), and plasmid PUC304A+ [21] DNA as a template. The PCR product was digested with *XmaI*-*EcoRI* and ligated to *XmaI*-*EcoRI* digested plasmid pGN.linker DNA [29] to create plasmid pGN.pVIII.

**pGC.pVII.** The full-length protein VII protein coding sequence (516bp) was amplified by PCR using primers *EcoRI*.fw.N and pVII.*SalI*.Rv (Table S1), and plasmid PUC304A+ [21] DNA as a template. The PCR product was digested with *EcoRI*-*SalI* and ligated to *EcoRI*-*SalI* digested plasmid pGC.linker DNA [29] to create plasmid pGC.pVII.

**pGC.pVII Del 1.** A 396 bp DNA fragment was amplified by PCR using primers Fw.*EcoRI*.pVII~~D~~1 and pVII.*SalI*.Rv (Table S1), and plasmid PUC304A+ [21] DNA as a template. The PCR product was digested with *EcoRI*-*SalI* and ligated to *EcoRI*-*SalI* digested plasmid pGC.linker DNA [29] to create plasmid pGC.pVII~~d~~1.

**pGC.pVII~~d~~2.** A 1000 bp DNA fragment was amplified by PCR using primers EF.Pro and IR.pVII.Del 2 (Table S1), and plasmid PUC304A+ [21] DNA as a template. Similarly, a 1000 bp DNA fragment was amplified by PCR using primers IF.pVII.Del 2 and ER.Pro (Table S1), and plasmid PUC304A+ [21] DNA as a template. In the third PCR, these two PCR products were reannealed and used as DNA template to amplify a 396 bp PCR product by overlapping PCR using *EcoRI*.fw.N and pVII.*SalI*.Rv primers (Table S1). The final PCR product was digested with *EcoRI*-*SalI* and ligated to *EcoRI*-*SalI* digested plasmid pGC.linker [29] DNA creating plasmid pGC.pVII~~d~~2 (containing a deletion of protein VII amino acid 41-80).

**pGC.pVII~~d~~3.** A 1000 bp DNA fragment was amplified by PCR using primers EF.Pro and IR.pVII.Del 3 (Table S1), and plasmid PUC304A+ [21] DNA as a template. Similarly, a 1000 bp DNA fragment was amplified by PCR using primers IF.pVII.Del 3 and ER.Pro



(Table S1), and plasmid PUC304A+ [21] DNA as a template. In the third PCR, these two PCR products were reannealed and used as DNA template to amplify a 381 bp PCR product by overlapping PCR using *EcoRI*.fw.N and pVII.*SalI*.Rv primers (Table S1). The final PCR product was digested with *EcoRI-SalI* and ligated to *EcoRI-SalI* digested plasmid pGC.linker [29] DNA creating plasmid pGC.pVIIId3 (containing a deletion of protein VII amino acid 81-125).

**pGC.pVIIId4.** A 375 bp DNA fragment was amplified by PCR using primers *EcoRI*.fw.N and *SalI*.Rv.pVII. Del 4. (Table S1), and plasmid PUC304A+ [21] DNA as a template was digested with *EcoRI-SalI* and ligated to *EcoRI-SalI* digested plasmid pGC.linker [29] DNA creating plasmid pGC.pVIIId4 (containing a deletion of protein VII amino acid 126-171).

**pGC.pVIIId3.1.** A 1000 bp DNA fragment was amplified by PCR using primers EF.Pro and IR.pVII.Del 3.1 (Table S1), and plasmid PUC304A+ [21] DNA as a template. Similarly, a 1000 bp DNA fragment was amplified by PCR using primers IF.pVII.Del 3.1 and ER.Pro (Table S1), and plasmid PUC304A+ [21] DNA as a template. In the third PCR, these two PCR products were reannealed and used as DNA template to amplify a 460 bp PCR product by overlapping PCR using *EcoRI*.fw.N and pVII.*SalI*.Rv primers (Table S1). The final PCR product was digested with *EcoRI-SalI* and ligated to *EcoRI-SalI* digested plasmid pGC.linker [29] DNA creating plasmid pGC.pVIIId3.1 (containing a deletion of protein VII amino acid 80-101).

**pGC.pVIIId3.2.** A 1000 bp DNA fragment was amplified by PCR using primers EF.Pro and IR.pVII.Del 3.2 (Table S1), and plasmid PUC304A+ [21] DNA as a template. Similarly, a 1000 bp DNA fragment was amplified by PCR using primers IF.pVII.Del 3.2 and ER.Pro (Table S1), and plasmid PUC304A+ [21] DNA as a template. In the third PCR, these two PCR products were reannealed and used as DNA template to amplify a 460 bp PCR product by overlapping PCR using *EcoRI*.fw.N and pVII.*SalI*.Rv primers (Table S1). The final PCR product was digested with *EcoRI-SalI* and ligated to *EcoRI-SalI* digested plasmid pGC.linker [29] DNA creating plasmid pGC.pVIIId3.2 (containing a deletion of protein VII amino acid 102-122).

**pGC.pVIIId70-90.** A 1000 bp DNA fragment was amplified by PCR using primers EF.Pro

and IR.pVII.Del 70-90 (Table S1), and plasmid PUC304A+ [21]DNA as a template. Similarly, a 1000 bp DNA fragment was amplified by PCR using primers IF.pVII.Del 70-90 and ER.Pro (Table S1), and plasmid PUC304A+ [21] DNA as a template. In the third PCR, these two PCR products reannealed and used as DNA template to amplify a 450 bp PCR product by overlapping PCR using *EcoRI*.fw.N and pVII.*SalI*.Rv primers (Table S1). The final PCR product was digested with *EcoRI-SalI* and ligated to *EcoRI-SalI* digested plasmid pGC.linker [29] DNA creating plasmid pGC.pVIIId70-90 (containing a deletion of protein VII amino acid 70-90).

**pGC.pVIIId4.1.** A 411 bp DNA fragment was amplified by PCR using primers *EcoRI*.fw.N and *SalI*.Rv.pVII. Del 4A. (Table S1), and plasmid PUC304A+ [21] DNA as a template. The PCR product was digested with *EcoRI-SalI* and ligated to *EcoRI-SalI* digested plasmid pGC.linker [29] DNA creating plasmid pGC.pVIIId4.1 (containing a deletion of protein VII amino acid 137-171).

**pGC.pVIIId4.2.** A 444 bp DNA fragment was amplified by PCR using primers *EcoRI*.fw.N and *SalI*.Rv.pVII. Del 4B. (Table S1), and plasmid PUC304A+ [21] DNA as a template. The PCR product was digested with *EcoRI-SalI* and ligated to *EcoRI-SalI* digested plasmid pGC.linker [29] DNA creating plasmid pGC.pVIIId4.2 (containing a deletion of pVII amino acid 148-171).

**pGC.pVIIId4.3.** A 477 bp DNA fragment was amplified by PCR using primers *EcoRI*.fw.N and *SalI*.Rv.pVII. Del 4C. (Table S1), and plasmid PUC304A+ [21] DNA as a template. The PCR product was digested with *EcoRI-SalI* and ligated to *EcoRI-SalI* digested plasmid pGC.linker [29] DNA creating plasmid pGC.pVIIId4.3 (containing a deletion of protein VII amino acid 159-171).

**pGC.pVIIId126-137.** A 1000 bp DNA fragment was amplified by PCR using primers EF.Pro and IR.pVII.Del 126-137 (Table S1), and plasmid PUC304A+ [21] DNA as a template. Similarly, a 1000 bp DNA fragment was amplified by PCR using primers IF.pVII.Del 126-137 and ER.Pro (Table S1), and plasmid PUC304A+ [21] DNA as a template. In the third PCR, these two PCR products were reannealed and used as DNA template to amplify a 483 bp PCR product by overlapping PCR using *EcoRI*.fw.N and pVII.*SalI*.Rv primers (Table S1). The final PCR product was digested with *EcoRI-SalI*

and ligated to *EcoRI-SalI* digested plasmid pGC.linker [29] DNA creating plasmid pGC.pVII<sub>126-137</sub> (containing a deletion of protein VII amino acid 126-137).

**Table S2. Other cellular proteins identified from LC-MS/MS. nd: No Data**

| Peptide Identity                                                        | Accession # | MW      | Protein Probability (32 hours Sample) | Protein Probability (48 hours Sample) | # of Peptide |
|-------------------------------------------------------------------------|-------------|---------|---------------------------------------|---------------------------------------|--------------|
| Cluster of Acetyl-CoA carboxylase 1 ACACA                               | Q9TTS3 [2]  | 35 kDa  | 100%                                  | 100%                                  | 5            |
| Tropomyosin alpha-1 chain TPM1                                          | Q5KR49      | 33 kDa  | 100%                                  | 100%                                  | 5            |
| Cluster of Vimentin VIM                                                 | P48616 [4]  | 54 kDa  | 100%                                  | 100%                                  | 5            |
| Cluster of 78 kDa glucose-regulated protein HSPA5                       | Q0VCX2 [2]  | 72 kDa  | 100%                                  | 100%                                  | 5            |
| Cluster of Adseverin SCIN                                               | Q28046 [2]  | 81 kDa  | 100%                                  | 100%                                  | 5            |
| Annexin A2 ANXA2                                                        | P04272 (+1) | 39 kDa  | 100%                                  | 100%                                  | 5            |
| EF-hand domain-containing protein D2 EFHD2                              | A5D7A0      | 27 kDa  | 100%                                  | 100%                                  | 5            |
| Cluster of Polyadenylate-binding protein 1 PABPC1                       | P61286 [5]  | 71 kDa  | 100%                                  | 100%                                  | 5            |
| Cluster of Heat shock protein HSP 90-beta HSP90AB1                      | Q76LV1 [16] | 83 kDa  | 100%                                  | 100%                                  | 5            |
| Heat shock protein beta-1 HSPB1                                         | Q3T149      | 22 kDa  | 100%                                  | 100%                                  | 5            |
| Cluster of Leucine-rich repeat flightless-interacting protein 2 LRRFIP2 | Q2T9W6 [2]  | 45 kDa  | 100%                                  | 100%                                  | 5            |
| Serine/arginine-rich splicing factor 1 SRSF1                            | Q0VCY7 (+3) | 28 kDa  | 100%                                  | 100%                                  | 5            |
| Gelsolin GSN                                                            | Q3SX14      | 81 kDa  | 100%                                  | 99%                                   | 5            |
| Alpha-crystallin B chain CRYAB                                          | P02510      | 20 kDa  | 100%                                  | 100%                                  | 5            |
| Lupus La protein homolog SSB                                            | P10881      | 47 kDa  | nd                                    | 100%                                  | 5            |
| Cluster of Poly [ADP-ribose] polymerase 1 PARP1                         | P18493 [3]  | 113 kDa | nd                                    | 100%                                  | 5            |
| Cluster of ATP-dependent RNA helicase A DHX9                            | Q28141 [2]  | 142 kDa | nd                                    | 100%                                  | 5            |
| Alpha-enolase OS=Bos taurus GN=ENO1 PE=1 SV=4                           | Q9XSJ4      | 47 kDa  | nd                                    | 100%                                  | 5            |

**Table S3. Ribosomal proteins identified from LC-MS/MS**

| Peptide Identity                | Accession # | MW     | Protein Probability (32 hours Sample) | Protein Probability (48 hours Sample) | # of Peptide |
|---------------------------------|-------------|--------|---------------------------------------|---------------------------------------|--------------|
| 40S ribosomal protein S2 RPS2   | O18789 (+1) | 18 kDa | 100%                                  | 100%                                  | 5            |
| 40S ribosomal protein S3 RPS3   | Q3T169      | 27 kDa | 100%                                  | 100%                                  | 5            |
| 60S ribosomal protein L6 RPL6   | Q58DQ3      | 33 kDa | 100%                                  | 100%                                  | 5            |
| 40S ribosomal protein S18 RPS18 | Q3T0R1      | 18 kDa | 100%                                  | 100%                                  | 5            |

**Table S4. Mitochondrial proteins identified from LC-MS/MS. nd: No Data**

| Peptide Identity                                                | Accession # | MW | Protein Probability (32 hours Sample) | Protein Probability (48 hours Sample) | # of Peptide |
|-----------------------------------------------------------------|-------------|----|---------------------------------------|---------------------------------------|--------------|
| Cluster of Pyruvate carboxylase PC                              | Q29RK2 [4]  | nd | nd                                    |                                       | 5            |
| Propionyl-CoA carboxylase beta chain PCCB                       | Q2TBR0      | nd | nd                                    |                                       | 5            |
| Cluster of CoA component 1 Q subcomponent-binding protein C1QBP | Q3T0B6 [2]  | nd | nd                                    |                                       | 5            |
| Cluster of ATP synthase subunit beta ATP5B                      | P00829 [19] | nd | nd                                    |                                       | 5            |
| GrpE protein homolog 1 GRPEL1                                   | Q3SZC1      | nd | nd                                    |                                       | 5            |
| Cluster of ATP synthase subunit alpha ATP5A1                    | P19483 [19] | nd | nd                                    |                                       | 5            |
| Hydroxyacylglutathione hydrolase HAGH                           | Q3B7M2      | nd | nd                                    |                                       | 5            |

**Table S5. Cytoskeleton proteins identified from LC-MS/MS**

| <b>Peptide Identity</b>                             | <b>Accession #</b> | <b>MW</b> | <b>Protein Probability<br/>(32 hours Sample)</b> | <b>Protein Probability<br/>(48 hours Sample)</b> | <b># of Peptide</b> |
|-----------------------------------------------------|--------------------|-----------|--------------------------------------------------|--------------------------------------------------|---------------------|
| Cluster of Alpha-actinin-4 ACTN4                    | A5D7D1 [7]         | 105 kDa   | 100%                                             | 100%                                             | 5                   |
| Cluster of Tubulin beta-5 chain TUBB5               | Q2KJD0 [10]        | 50 kDa    | 100%                                             | 100%                                             | 5                   |
| Cluster of Myosin regulatory light chain 12B MYL12B | A4IF97 [6]         | 20 kDa    | 100%                                             | 100%                                             | 5                   |
| Myosin-10 MYH10                                     | Q27991             | 229 kDa   | 100%                                             | 100%                                             | 5                   |
| F-actin-capping protein subunit alpha-1 CAPZA1      | A4FUA8             | 33 kDa    | 100%                                             | 100%                                             | 5                   |

**Table S6. Nuclear proteins identified from LC-MS/MS. nd: No Data**

| <b>Peptide Identity</b>                          | <b>Accession #</b> | <b>MW</b> | <b>Protein Probability<br/>(32 hours Sample)</b> | <b>Protein Probability<br/>(48 hours Sample)</b> | <b># of Peptide</b> |
|--------------------------------------------------|--------------------|-----------|--------------------------------------------------|--------------------------------------------------|---------------------|
| Heterogeneous nuclear ribonucleoprotein F HNRNPF | Q5E9J1             | nd        | nd                                               | nd                                               | 4                   |
| Small nuclear ribonucleoprotein Sm D2 SNRPD2     | Q3SZF8             | nd        | nd                                               | nd                                               | 2                   |

**Table S7. Nucleolar proteins identified from LC-MS/MS. nd: No Data**

| <b>Peptide Identity</b> | <b>Accession #</b> | <b>MW</b> | <b>Protein Probability<br/>(32 hours Sample)</b> | <b>Protein Probability<br/>(48 hours Sample)</b> | <b># of Peptide</b> |
|-------------------------|--------------------|-----------|--------------------------------------------------|--------------------------------------------------|---------------------|
| Nucleophosmin NPM1      | Q3T160             | nd        | nd                                               | nd                                               | 4                   |

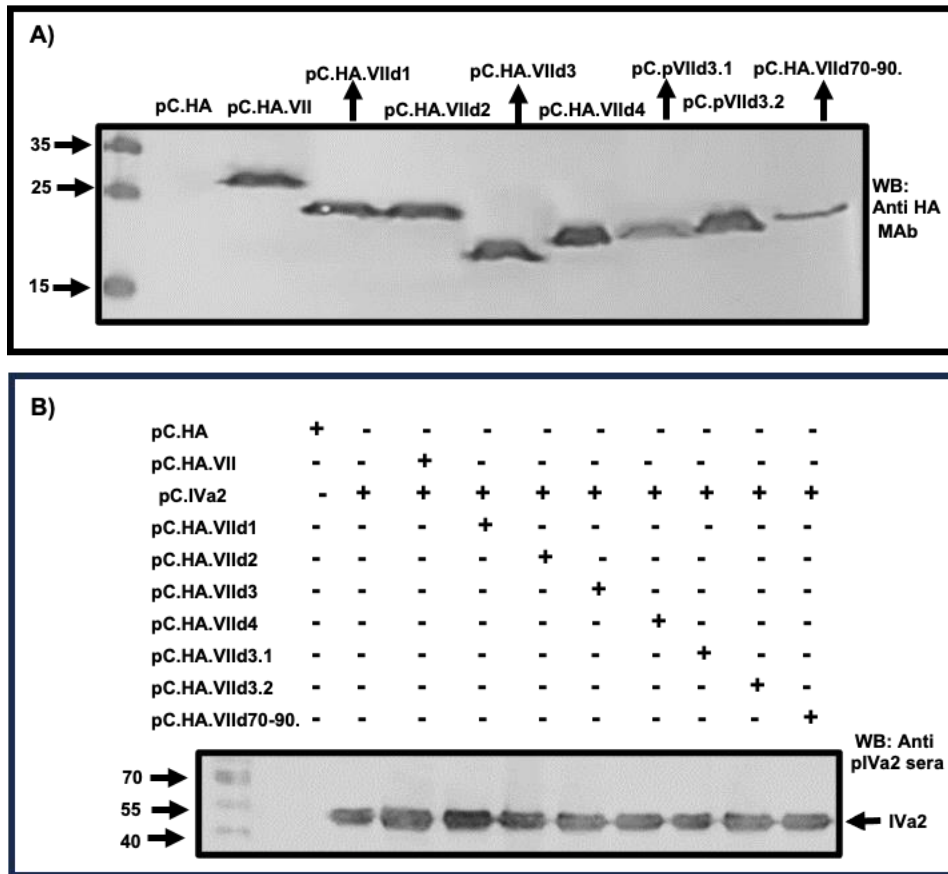

**Figure S1. Western blots.** Proteins from the lysates of cells co-transfected with indicated plasmids were separated by 12 % SDS-PAGE, transferred to nitrocellulose and probed in Western blot using (A) anti-HA MAb, B) anti-IVa2 sera. Molecular weight markers are shown on the left of the panel.

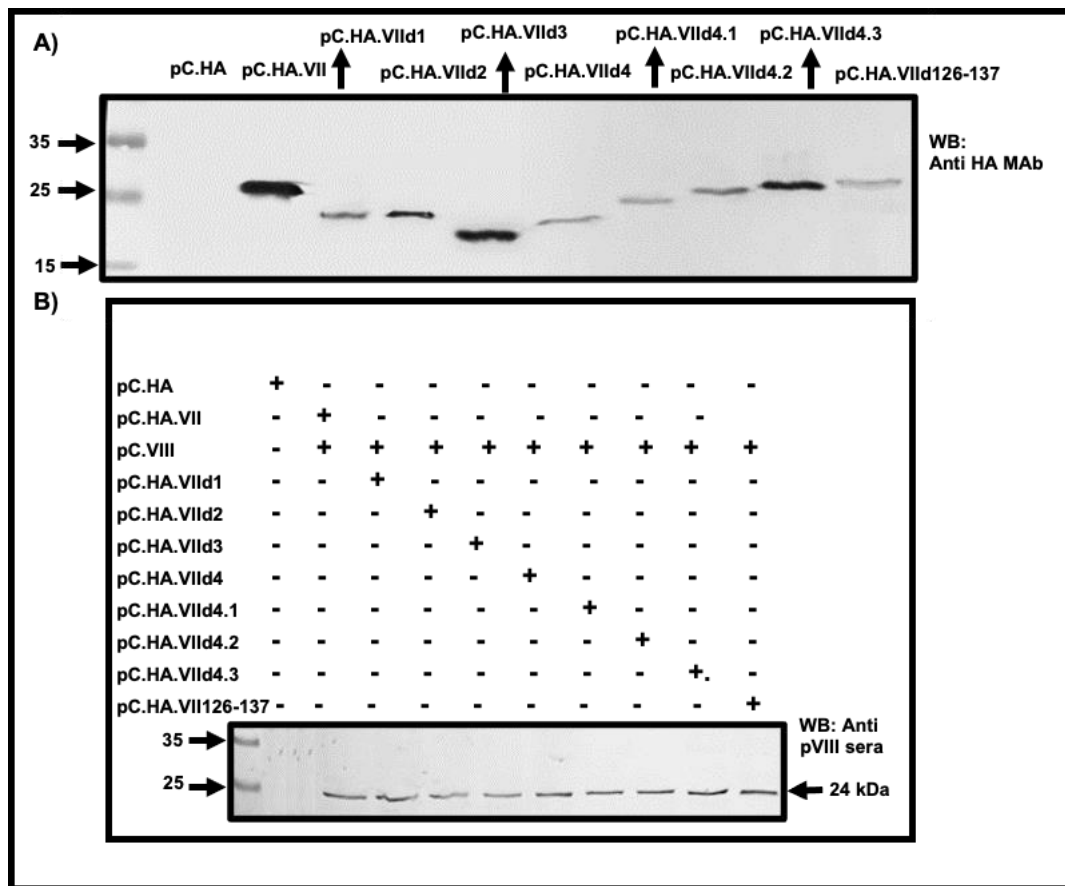

**Figure S2. Western blot.** Proteins from the lysates of cells co-transfected with indicated plasmid DNAs separated by 12% SDS-PAGE, transferred to nitrocellulose and probed in Western blot using A) anti-HA MAb. B) anti-pVIII sera. Molecular weight markers are shown on the left of the panel.

**Table S8. Summary for 3.9 Results (For both BiFC assay & CO-IP)**

| Plasmid containing protein VII deletion/truncation | Region of protein VII deleted/truncated | Interaction with protein IVa2 |
|----------------------------------------------------|-----------------------------------------|-------------------------------|
| pVIId1                                             | 1-40                                    | +                             |
| pVIId2                                             | 41-80                                   | +                             |
| pVIId3                                             | 81-125                                  | -                             |
| pVIId4                                             | 126-171                                 | +                             |
| pVIId3.1                                           | 81-100                                  | -                             |
| pVIId3.2                                           | 101-121                                 | +                             |
| pVIId70-90                                         | 71-90                                   | +                             |

**Table S9. Summary for 3.10 Results (For both BiFC assay & CO-IP)**

| Plasmid containing protein VII deletion/truncation | Region of protein VII deleted/truncated | Interaction with protein VIII |
|----------------------------------------------------|-----------------------------------------|-------------------------------|
| pVIIId1                                            | 1-40                                    | +                             |
| pVIIId2                                            | 41-80                                   | +                             |
| pVIIId3                                            | 81-125                                  | +                             |
| pVIIId4                                            | 126-171                                 | -                             |
| pVIIId4.1                                          | 138-171                                 | +                             |
| pVIIId4.2                                          | 149-171                                 | +                             |
| pVIIId4.3                                          | 160-171                                 | +                             |
| pVIIId126-137                                      | 126-137                                 | -                             |

**Table S10.** The percentage of cells showing similar display of protein distribution

| Figure | Panel                  | % of cells displaying pattern |
|--------|------------------------|-------------------------------|
| 2C     | BAdV-3                 | 90%                           |
|        | pC.HA.VII              | 90%                           |
| 2E     | pGFP- $\beta$ -gal     | 95%                           |
|        | pVII-GFP- $\beta$ -gal | 95%                           |
| 2F     | BAdV-3                 | 95%                           |
|        | pC.HA.VII              | 90%                           |

**Table S11.** The percentage of cells showing similar display of protein distribution

| Figure | Panel                      | % of cells displaying pattern |
|--------|----------------------------|-------------------------------|
| 3C     | pC.HA.VII                  | 87%                           |
|        | pC.HA.VII <sub>mNLS1</sub> | 85%                           |

|    |                       |     |
|----|-----------------------|-----|
|    | pC.HA.VIIImNLS2       | 85% |
|    | pC.HA.VIIImNLS3       | 80% |
|    | pC.HA.VIIImNLS4       | 80% |
| 3F | pC.HA.VII             | 85% |
|    | pC.HA.VIIImNLS1,2     | 85% |
|    | pC.HA.VIIImNLS1,2,3   | 85% |
|    | pC.HA.VIIImNLS1,2,3,4 | 80% |

---

**Table S12.** The percentage of cells showing similar display of protein distribution

| Figure | Panel                 | % of cells displaying pattern |
|--------|-----------------------|-------------------------------|
| 4      | pC.HA.VII             | 90%                           |
|        | pC.HA.VIIImNLS1       | 80%                           |
|        | pC.HA.VIIImNLS2       | 85%                           |
|        | pC.HA.VIIImNLS3       | 85%                           |
|        | pC.HA.VIIImNLS4       | 90%                           |
|        | pC.HA.VIIImNLS1,2     | 85%                           |
|        | pC.HA.VIIImNLS1,2,3   | 85%                           |
|        | pC.HA.VIIImNLS1,2,3,4 | 90%                           |

---
